# Supplementary material for: BNIP3 phosphorylation by JNK1/2 promotes mitophagy via enhancing its stability under hypoxia
Source: PubMed Central journal article supplement (PMC9672126; doi:10.1038/s41419-022-05418-z), 2022-11-17

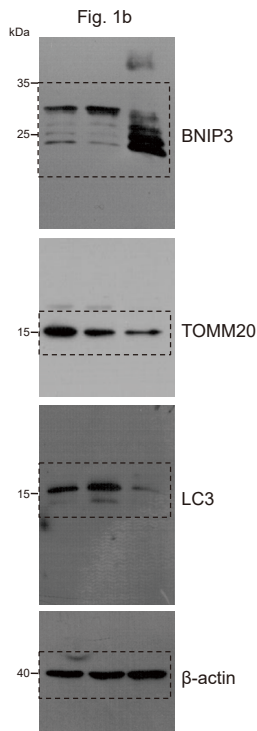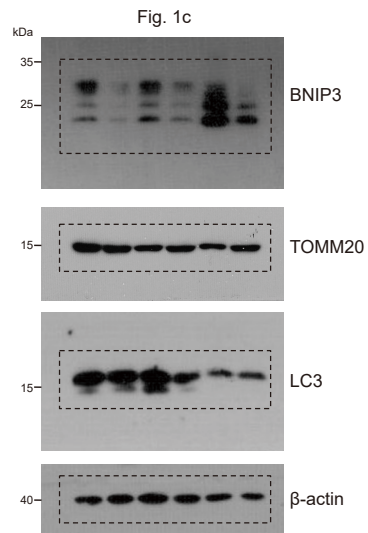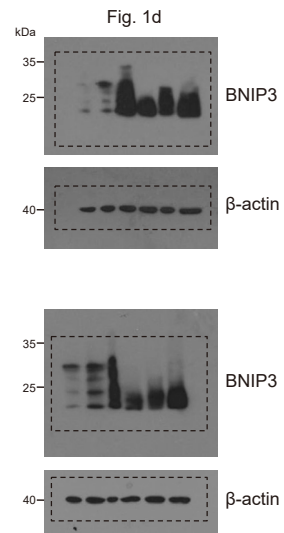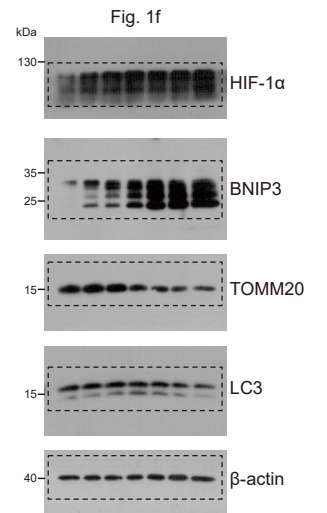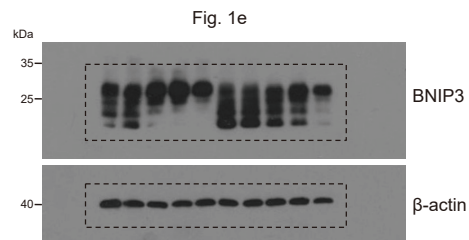

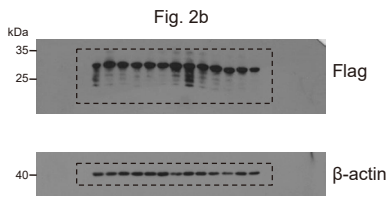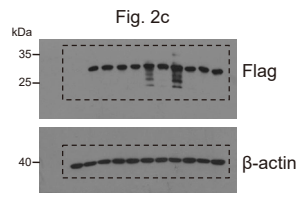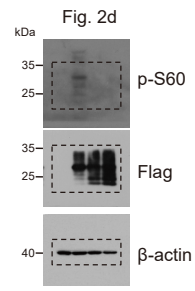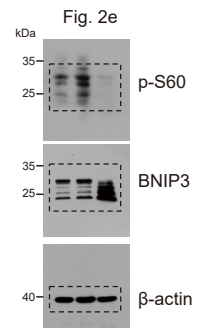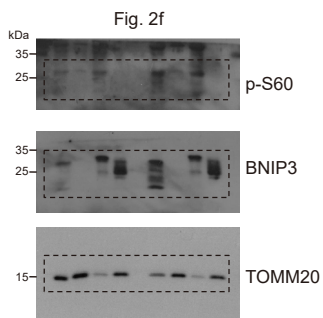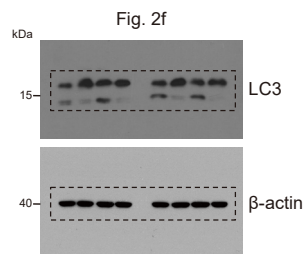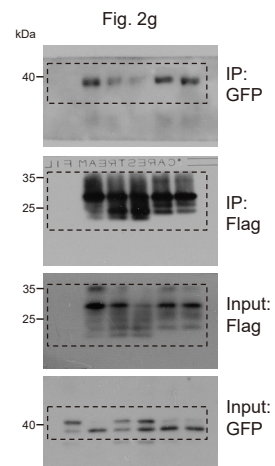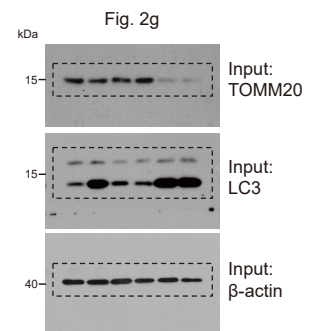

Fig. 3a (left)

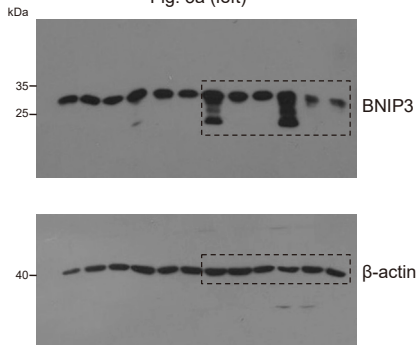

Fig. 3a (right)

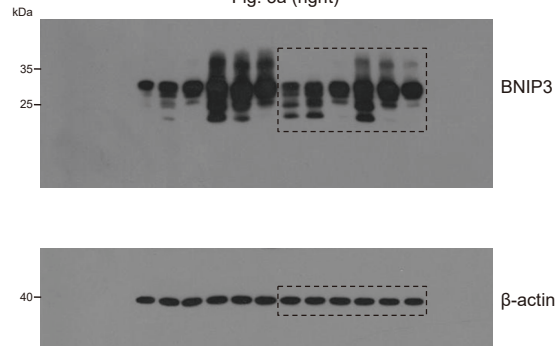

Fig. 3g

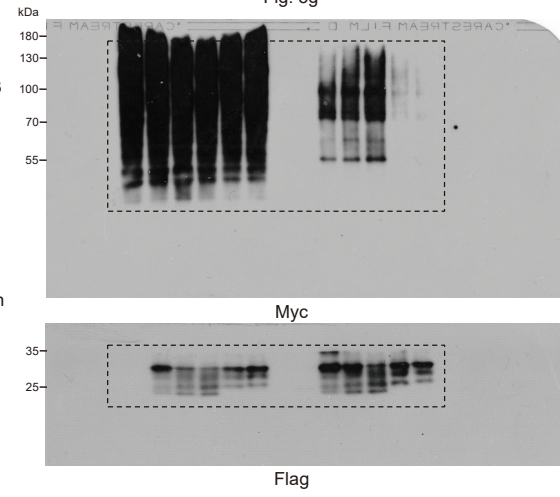

Fig. 3c

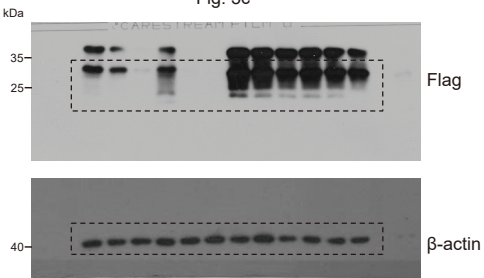

Fig. 3e

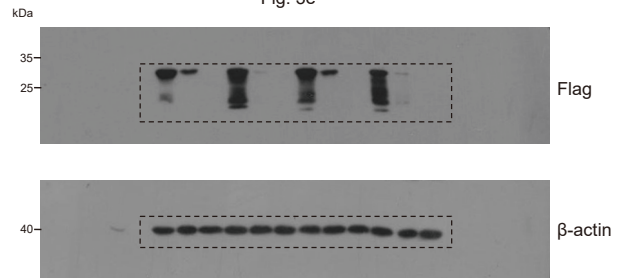

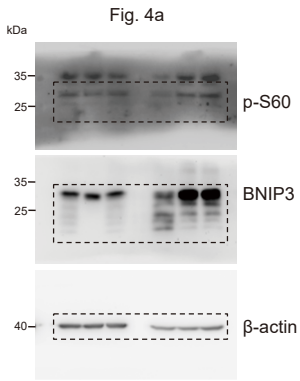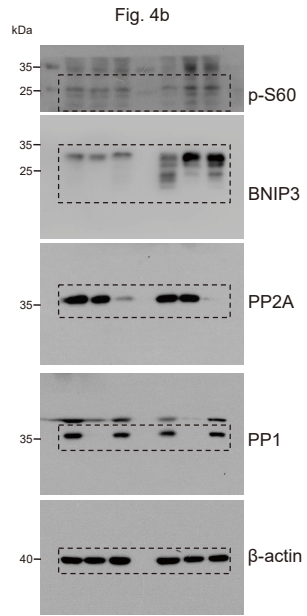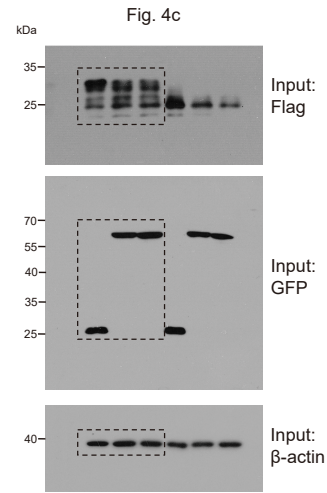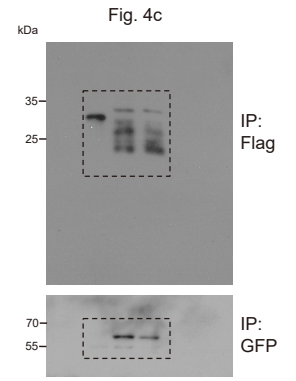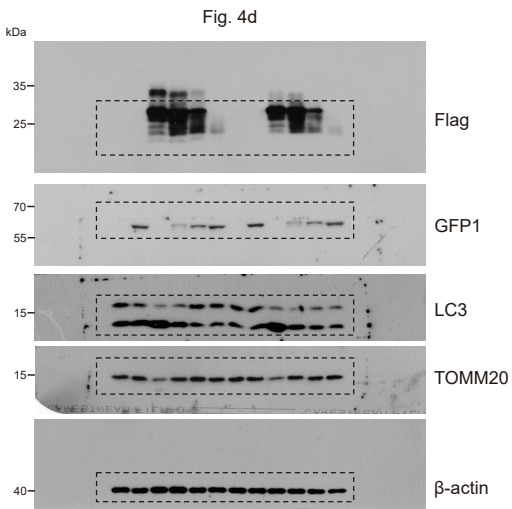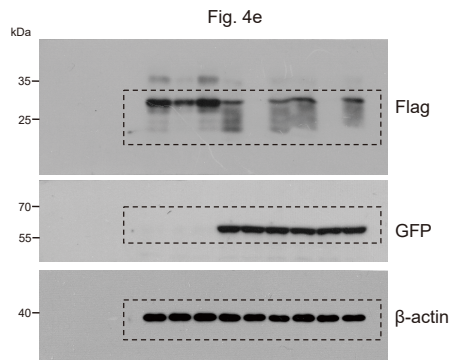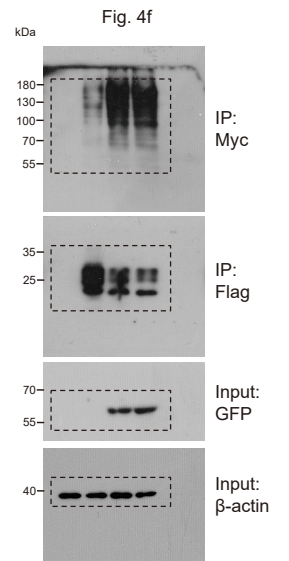



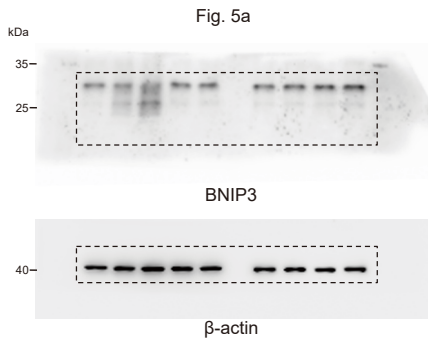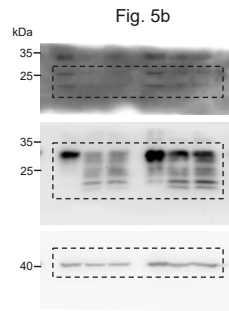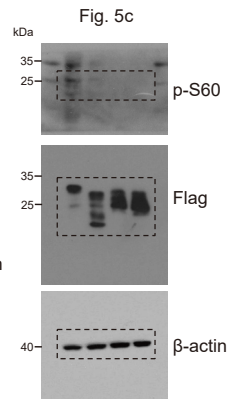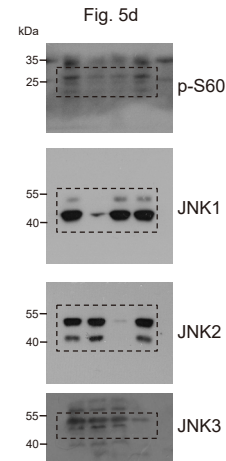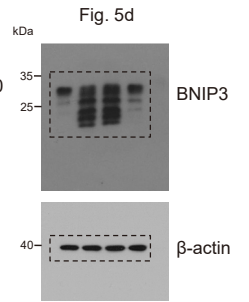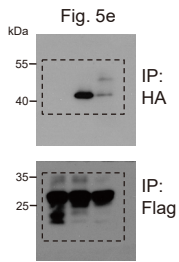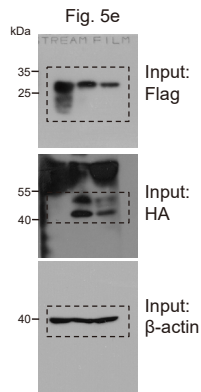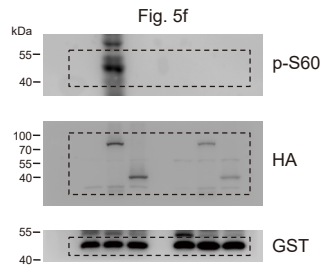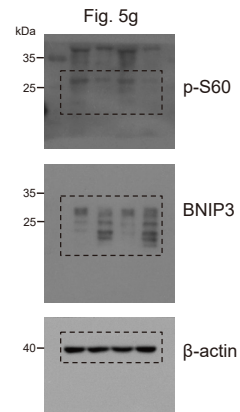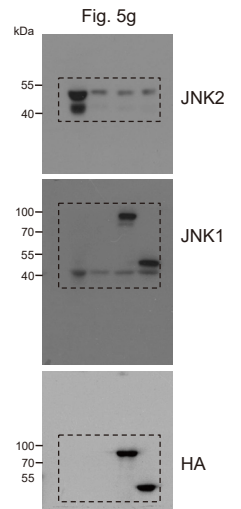

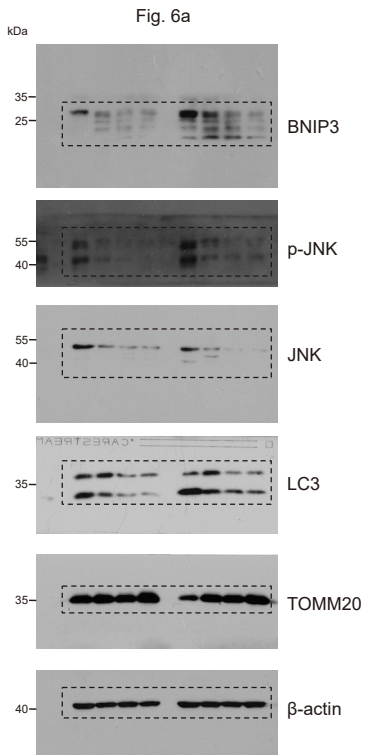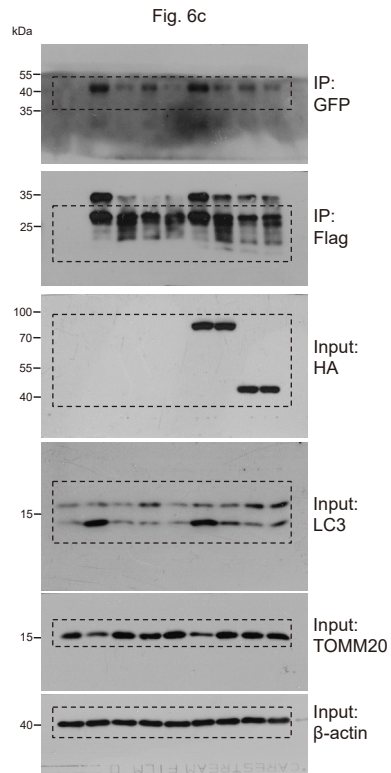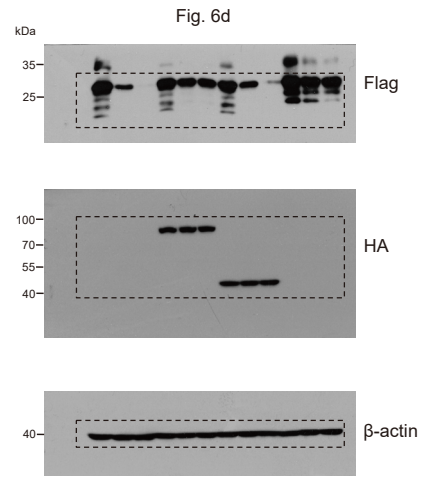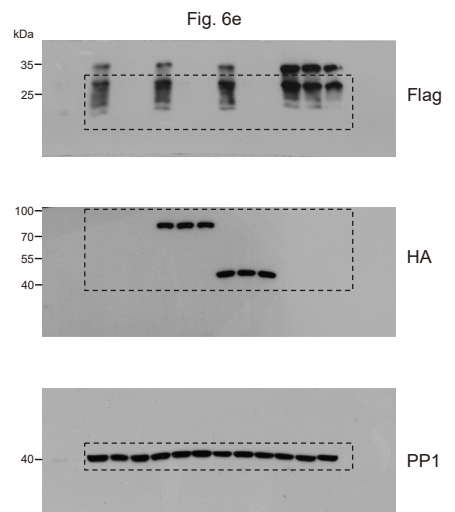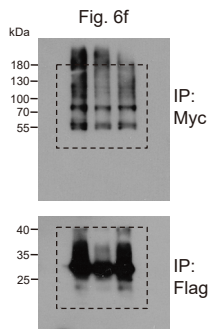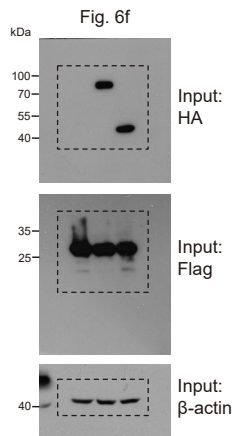

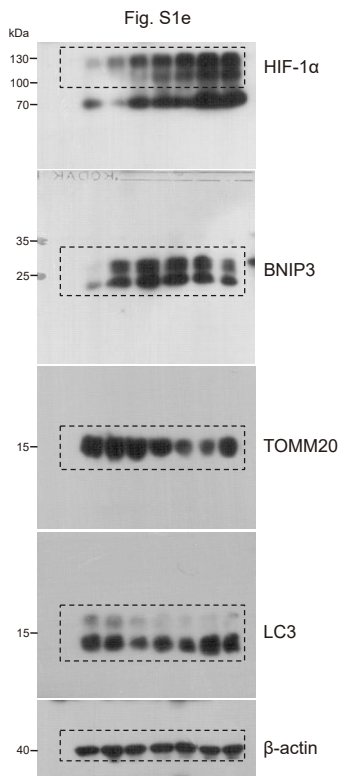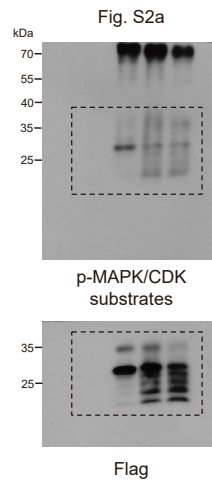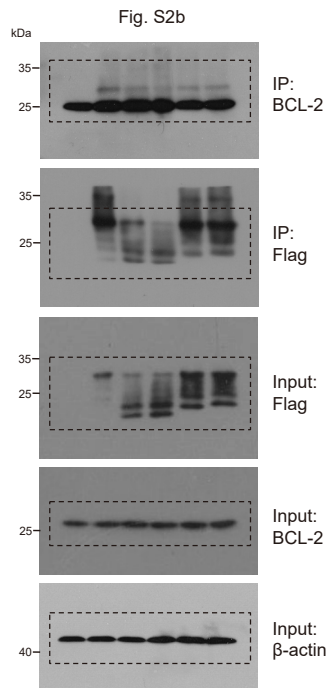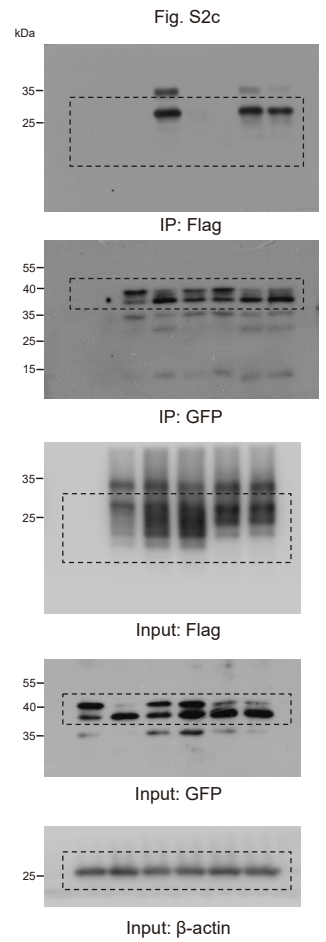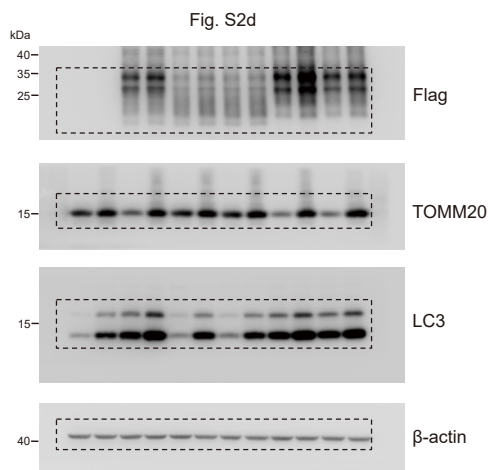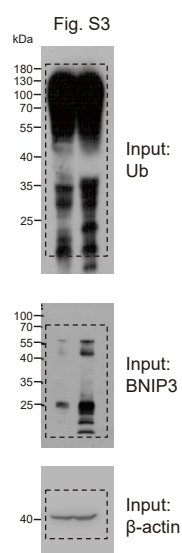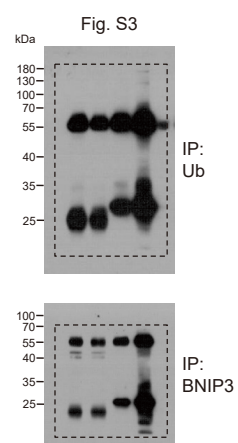

Fig. S4a (left)

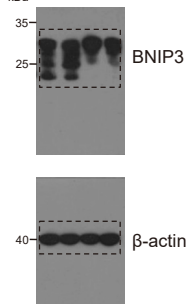

Fig. S4a (right)

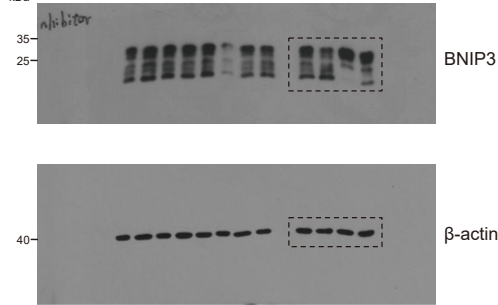

Fig. 4c

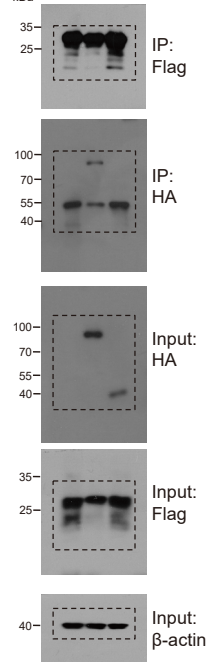

Fig. S4d

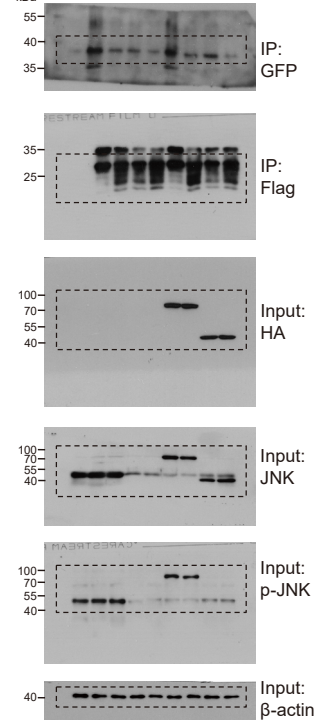

Fig. S4b

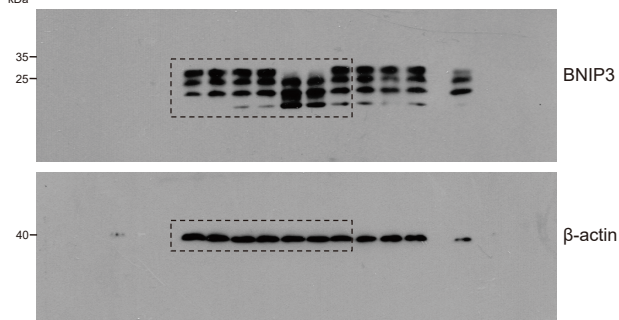

Fig. S5a

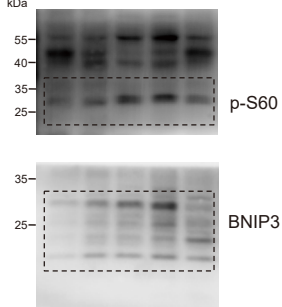

Fig. S5a

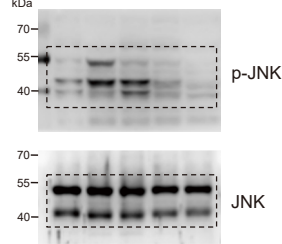

Fig. S5a

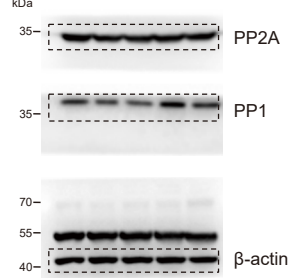

Supplement: 41419_2022_5418_MOESM2_ESM.pdf [file 41419_2022_5418_MOESM2_ESM.pdf]
