# Supplementary material for: BNIP3 phosphorylation by JNK1/2 promotes mitophagy via enhancing its stability under hypoxia
Source: PubMed Central journal article supplement (PMC9672126; doi:10.1038/s41419-022-05418-z), 2022-11-17
Supplement: 41419_2022_5418_MOESM1_ESM.pdf [file 41419_2022_5418_MOESM1_ESM.pdf]

1 **Supplementary material for**

2 **BNIP3 phosphorylation by JNK1/2 promotes mitophagy via enhancing its stability under hypoxia**

3 Yun-Ling He, Jian Li, Sheng-Hui Gong, Xiang Cheng, Ming Zhao, Yan Cao, Tong Zhao, Yong-Qi Zhao, Ming  
4 Fan, Hai-Tao Wu, Ling-Ling Zhu, Li-Ying Wu

5 Corresponding authors:

6 Ming Fan, Email: fanmingchina@126.com;

7 Hai-Tao Wu, Email: wuht@bmi.ac.cn;

8 Ling-Ling Zhu, Email: linglingzhu@hotmail.com;

9 Li-Ying Wu, Email: liyingwu\_china@163.com

10 **This file includes:**

11 Fig. S1. Hypoxia regulates mitophagy and phosphorylation of BNIP3.

12 Fig. S2. Phosphorylation of BNIP3 at S60/T66 is critical to promote mitophagy

13 Fig. S3 BNIP3 interacts with ubiquitin.

14 Fig. S4. JNK1/2 is the kinase responsible for BNIP3 phosphorylation.

15 Fig. S5. BNIP3 phosphorylation at S60/T66 by JNK enhances mitophagy.

16 Table S1. The primer information for Site-directed mutagenesis and siRNA-resistant constructs.

17 Table S2. List of siRNA used in this study.

18 Table S3. Sequence of real-time PCR primer used in this study.

19

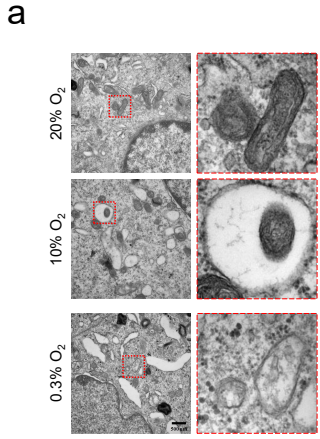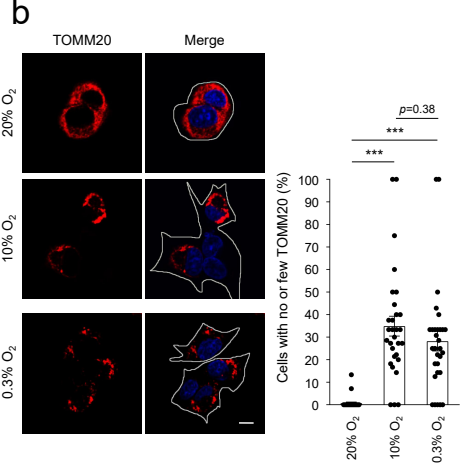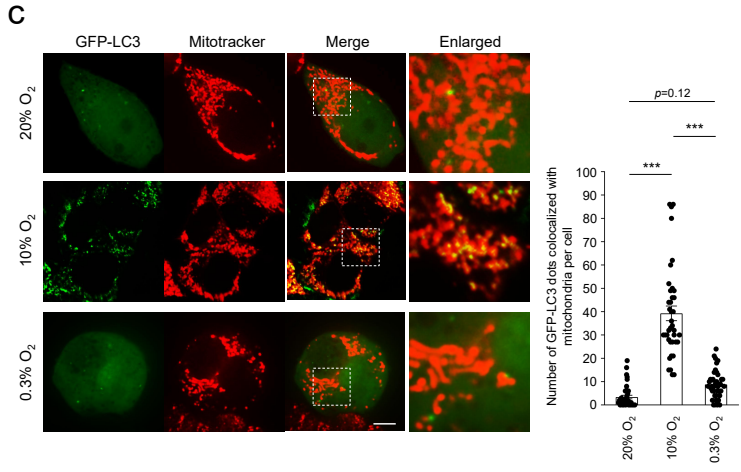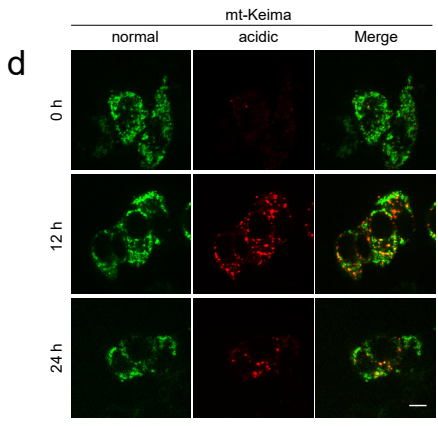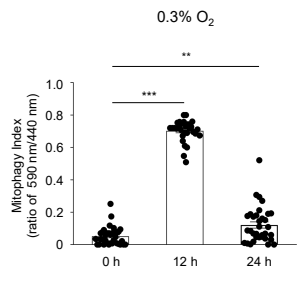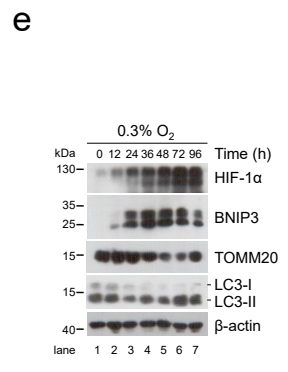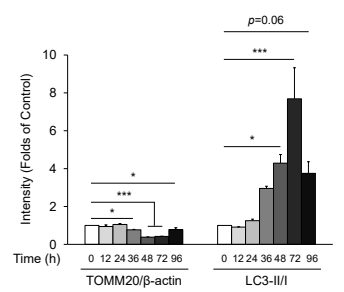

20 **Fig. S1. Hypoxia regulates mitophagy and phosphorylation of BNIP3.**

21 (a) Mitochondria morphology was analyzed via transmission electron microscopy (TEM) after PC12 cells were  
22 exposed to 20% O<sub>2</sub>, 10% O<sub>2</sub> or 0.3% O<sub>2</sub> for 24 h. The red boxes indicate representative mitochondria exposed to  
23 different oxygen conditions. Scale bar, 500 nm. (b) PC12 cells were exposed to 20% O<sub>2</sub>, 10% O<sub>2</sub> or 0.3% O<sub>2</sub> for  
24 24 h. Cells were identified by immunofluorescence staining with antibodies against β-actin (white outline) and  
25 TOMM20 (red), and nuclear DNA was marked using DAPI (blue). Scale bars, 10 μm. The percentage of cells  
26 with no or few TOMM20 was quantified. *n* = 30. (c) PC12 cells were treated the same as in **a**, and mitophagy  
27 was identified and quantified by co-localization of autophagosomes (GFP-LC3, green) and mitochondria  
28 (Mitotracker, red). Scale bar, 10 μm. *n* = 40. (d) PC12 cells stably expressing mt-Keima were exposed to 0.3%  
29 O<sub>2</sub> for 0, 12, 24 h, and mitophagy was quantified by the ratio of acidic (590 nm, red) to normal mitochondria  
30 (440 nm, green). Scale bar, 10 μm. *n* ≅ 30. (e) HeLa cells were exposed to 0.3% O<sub>2</sub> for the indicated time, the  
31 levels of BNIP3 and mitophagy related proteins were detected via western blotting. *n*=3. The data are expressed  
32 as means ± SEM. \**P* < 0.05, \*\**P* < 0.01, \*\*\**P* < 0.001 versus the indicated group.

**a**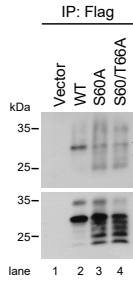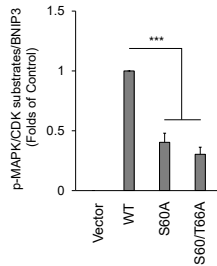**b**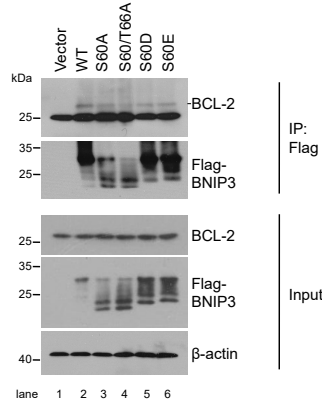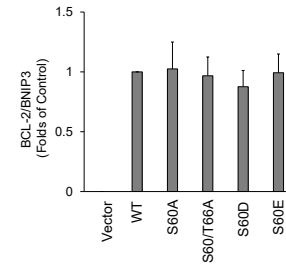**c**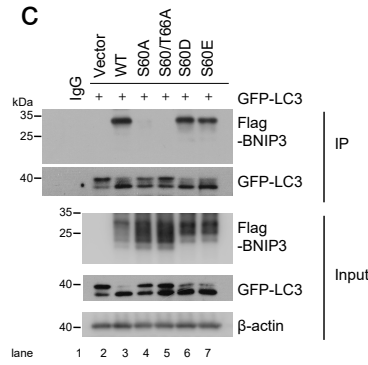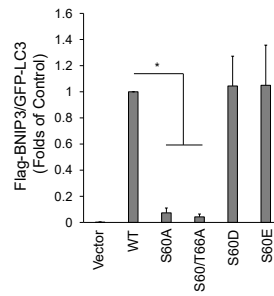**d**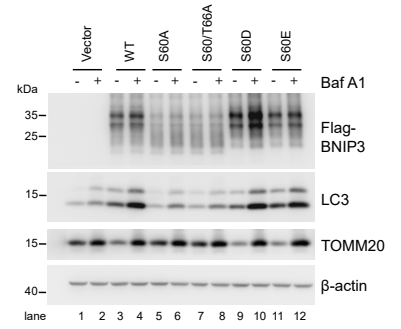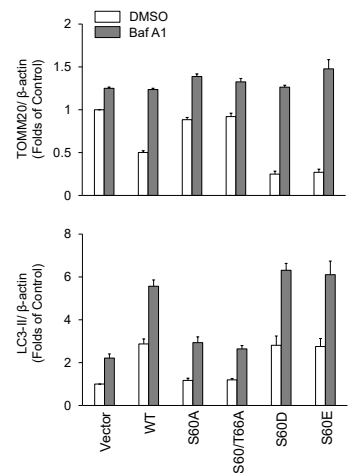**e**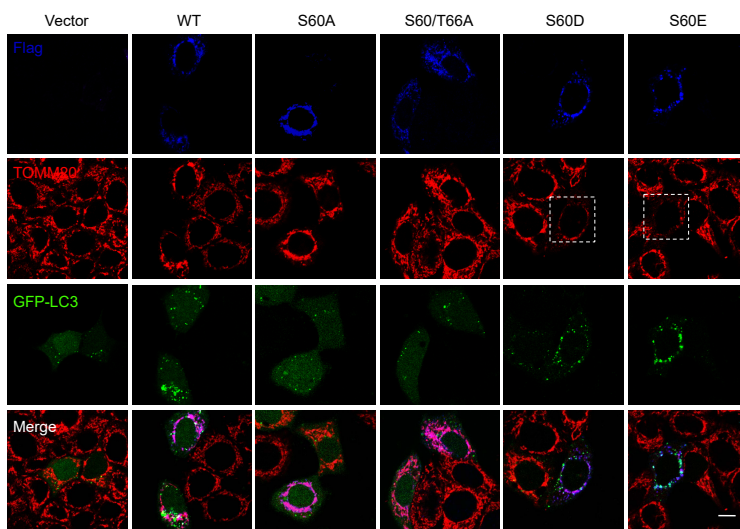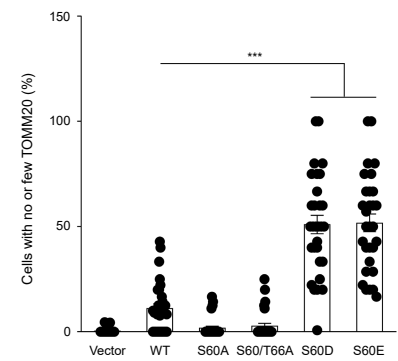

33 **Fig. S2. Phosphorylation of BNIP3 at S60/T66 is critical to promote mitophagy.**

34 (a) HeLa cells were transfected with empty vector, WT or the indicated mutated Flag-BNIP3, and then, the cell  
35 lysates were subjected to immunoprecipitation (IP) with an anti-Flag antibody. Phosphorylation of BNIP3 at  
36 S60/T66 was detected in the immune complexes via western blotting using an anti-phospho-MAPK/CDK  
37 substrates antibody.  $n = 3$ . (b) HeLa cells were transfected with empty vector, WT or the indicated Flag-BNIP3  
38 mutants for 48 h. Cell lysates were immunoprecipitated with the anti-Flag antibody and then subjected to  
39 western blot analysis with BCL-2 and Flag antibodies.  $n = 3$ . (c) HeLa cells were co-transfected with GFP-LC3  
40 and empty vector, WT or the indicated Flag-BNIP3 mutants for 48 h, same as Figure 2g, cell lysates were  
41 immunoprecipitated with the anti-mouse IgG or the anti-GFP antibody and detected by western blotting.  $n = 3$ .  
42 (d) HeLa cells were transfected with empty vector, WT or the indicated Flag-BNIP3 mutants for 48 h and  
43 treated with 20 nM bafilomycin A1 (Baf A1) for additional 12 h. Cell lysates were analyzed by western blotting.  
44  $n = 3$ . (e) HeLa cells were transfected with GFP-LC3 and empty vector, WT or the indicated Flag-BNIP3  
45 mutants for 48 h. The cells were then fixed and immunostained with Flag (blue) and TOMM20 (Red). The white  
46 boxes indicate cells with few mitochondria. Scale bars, 10  $\mu\text{m}$ .  $n = 30$ . The data are expressed as means  $\pm$  SEM.  
47 \* $P < 0.05$ , \*\* $P < 0.01$ , \*\*\* $P < 0.001$  versus the indicated group.

48

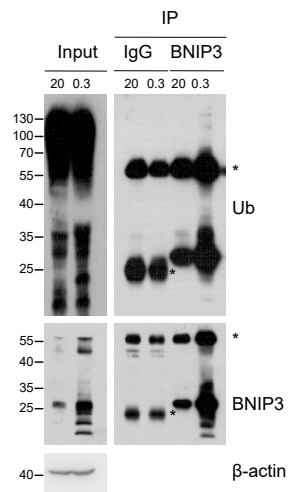

\* IgG heavy and light chains

49 **Fig. S3 BNIP3 interacts with ubiquitin.**

50 PC12 cells were exposed to 20% O<sub>2</sub> or 0.3% O<sub>2</sub> supplemented with 10 μM MG132 for 6 h. Cell lysates were  
51 boiled and immunoprecipitated with mouse IgG or anti-BNIP3 antibody. Then, the immune complexes were  
52 analyzed via western blotting. Asterisks indicate the heavy and light chains of IgG.

53

**a**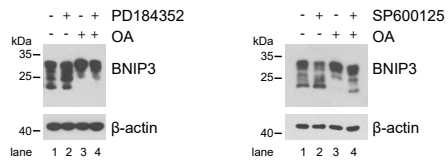**b**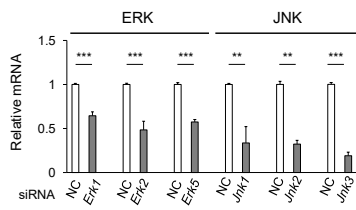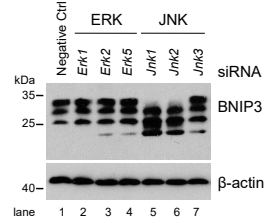**c**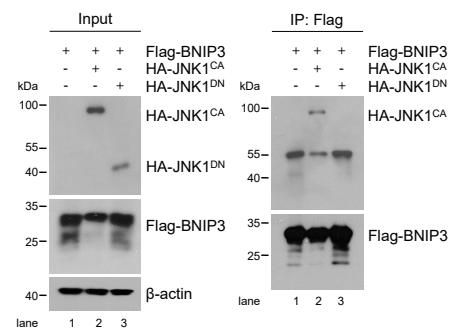**d**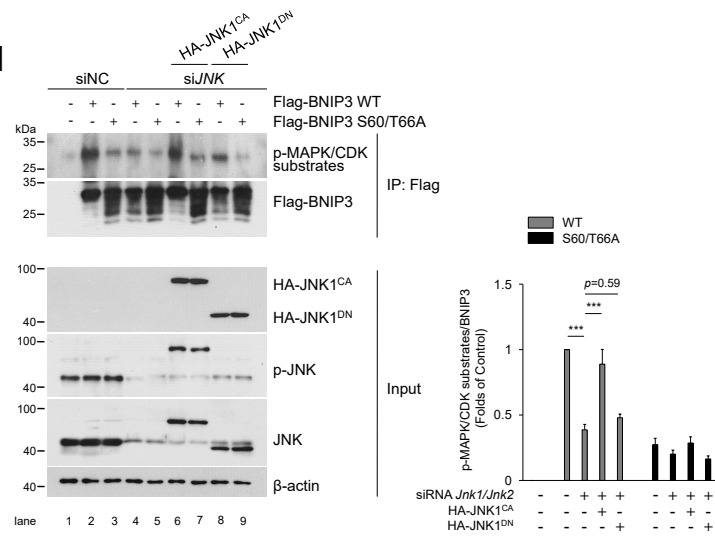



54 **Fig. S4. JNK1/2 is the kinase responsible for BNIP3 phosphorylation.**  
55 (a) PC12 cells were treated with okadaic acid (OA) and PD184352 (left) or SP600125 (right) for 12 h and  
56 analyzed via western blotting with an anti-BNIP3 or anti- $\beta$ -actin antibody. (b) PC12 cells were transfected with  
57 negative control (NC) or the indicated siRNA for 48 h, and the mRNA levels of related genes (left) and BNIP3  
58 expression (right) were detected by real-time PCR and western blotting, respectively.  $n \cong 3$ . (c) HeLa cells  
59 were transfected with Flag-BNIP3 and constitutively active JNK1 (HA-JNK1CA) (HA-MKK7-JNK1) or  
60 dominant negative JNK1 (HA-JNK1DN) (HA-JNK1-APF) for 48 h. Cell lysates were then immunoprecipitated  
61 with an anti-Flag antibody and detected by western blotting with an anti-HA or anti-Flag antibody. (d) *JNK1*  
62 and *JNK2* knockdown HeLa cells were transfected with WT or S60/T66A and HA-JNK1<sup>CA</sup> or HA-JNK1<sup>DN</sup>  
63 mutants, and 48 h post-transfection, cell lysates were immunoprecipitated with an anti-Flag antibody. The  
64 immune complexes were then analyzed via western blotting with the indicated antibodies.  $n = 3$ . The data are  
65 expressed as means  $\pm$  SEM. \* $P < 0.05$ , \*\* $P < 0.01$ , \*\*\* $P < 0.001$  versus the indicated group.

66

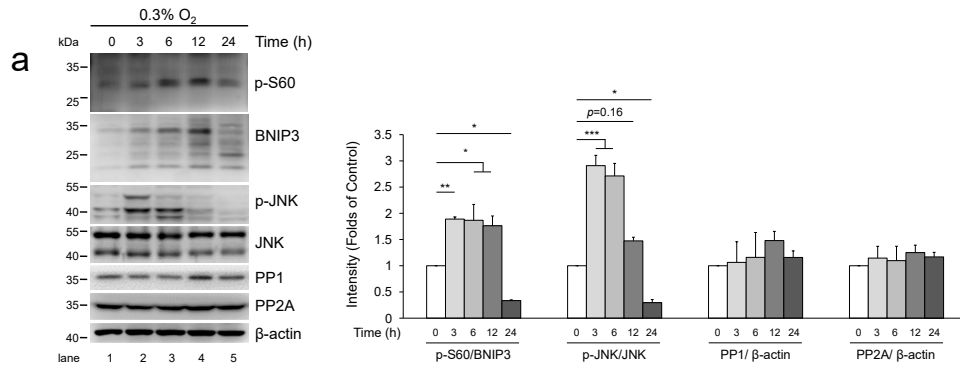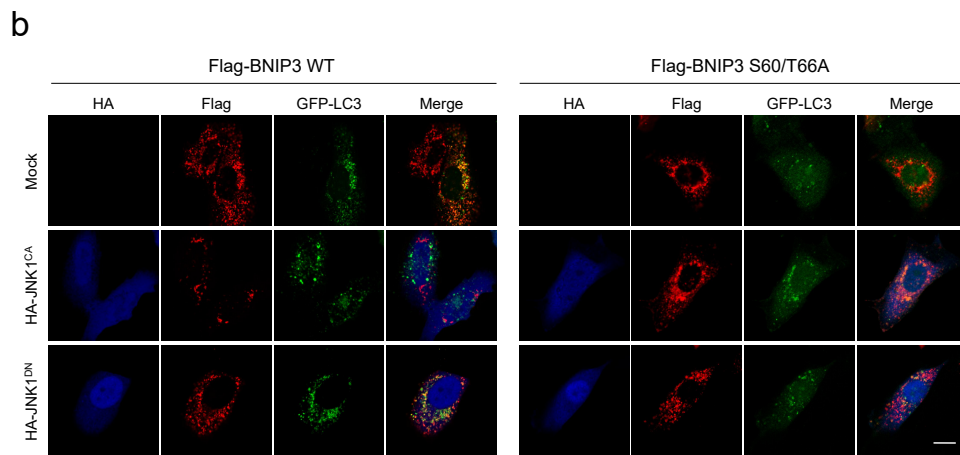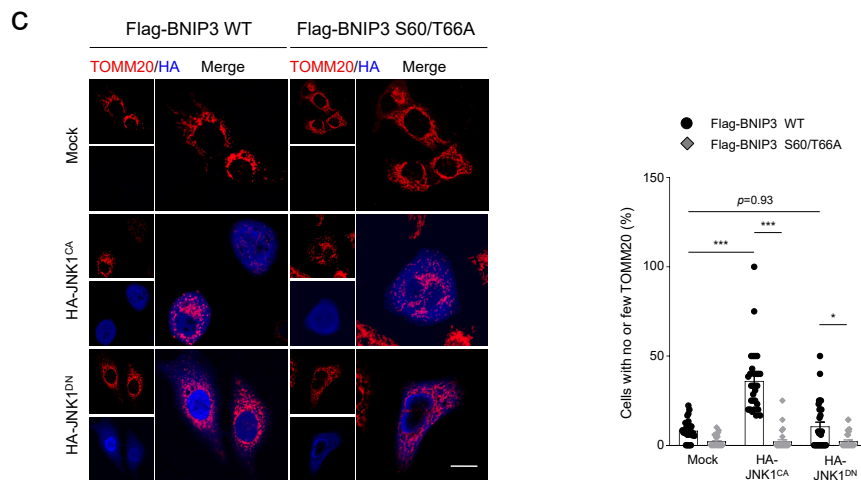

67 **Fig. S5. BNIP3 phosphorylation at S60/T66 by JNK enhances mitophagy.**

68 (a) PC12 cells were exposed to 0.3% O<sub>2</sub> for the indicated time, phosphorylation of BNIP3 and expression of  
69 PP1 and PP2A and JNK activity were detected via western blotting. *n* = 3. (b) Representative images of GFP-  
70 LC3 puncta in Flag-BNIP3 stably expressed HeLa cells, co-transfected with plasmids encoding HA-JNK1. Cells  
71 were identified by immunofluorescence staining with antibodies against HA (blue) and Flag (red). Scale bars, 10  
72 μm. (c) HeLa cells stably expressing Flag-BNIP3 were transfected with CA or DN HA-JNK1 and  
73 immunostained with HA (blue) and TOMM20 (Red). The percentage of cells with no or few TOMM20 was  
74 quantified. Scale bars, 10 μm. *n* = 30. The data are expressed as means ± SEM. \**P* < 0.05, \*\**P* < 0.01, \*\*\**P* <  
75 0.001 versus the indicated group.

76

77 **Table S1. The primer information for the site-directed mutagenesis and the siRNA-resistant constructs.**

| Plasmids name                    | Forward primer                                             | Reverse primer                                           |
|----------------------------------|------------------------------------------------------------|----------------------------------------------------------|
| S12A                             | 5'-<br>AGAACCTGCAGGGCGCCTGGGTAGAACT<br>GC-3'               | 5'-<br>GCAGTTCTACCCAGGCGCCCTGCAGGTTC<br>T-3'             |
| S19A                             | 5'-<br>TAGAACTGCACTTCGCCAATGGGAATGG<br>GA-3'               | 5'-<br>TCCCATTCCCATTGGCGAAGTGCAGTTCT<br>A-3'             |
| S48A                             | 5'-<br>ATGCGCAGCATGAAGCTGGACGAAGCAG<br>CT-3'               | 5'-<br>AGCTGCTTCGTCCAGCTTCATGCTGCGCA<br>T-3'             |
| S56A                             | 5'-<br>GCAGCTCCAAGAGCGCTCACTGTGACAG<br>CC-3'               | 5'-<br>GGCTGTACAGTGAGCGCTCTTGGAGCT<br>GC-3'              |
| S60A                             | 5'-<br>GCTCTCACTGTGACGCCCCACCTCGCTCC<br>C-3'               | 5'-<br>GGGAGCGAGGTGGGGCGTCACAGTGAG<br>AGC-3'             |
| S60D                             | 5'-<br>GCTCTCACTGTGACGACCCACCTCGCTCC<br>C-3'               | 5'-<br>GGGAGCGAGGTGGGTCGTCACAGTGAGA<br>GC-3'             |
| S60E                             | 5'-<br>GCTCTCACTGTGACGAACCACCTCGCTCC<br>C-3'               | 5'-<br>GGGAGCGAGGTGGTTCGTCACAGTGAGA<br>GC-3'             |
| T66A                             | 5'-<br>CACCTCGTCCCAGGCACCACAAGATAC<br>CA-3'                | 5'-<br>TGGTATCTTGTGGTGCCTGGGAGCGAGGT<br>G-3'             |
| S79A                             | 5'-<br>GAAATAGACACCCACGCCTTTGGTGAGA<br>AAAA-3'             | 5'-<br>TTTTTCTACCAAAGGCGTGGGTGTCTAT<br>TTC-3'            |
| S85/T86A                         | 5'-<br>GTGAGAAAAACGCCGCTCTGTCTGAGGA<br>AG-3'               | 5'-<br>CTTCTCAGACAGAGCGGCGTTTTTCTCA<br>C-3'              |
| S88A                             | 5'-<br>GAAAAACAGCACTCTGGCTGAGGAAGAT<br>TATA-3'             | 5'-<br>TATAATCTTCTCAGCCAGAGTGCTGTTTT<br>TC-3'            |
| T141/S142A                       | 5'-<br>GCATGAGAAACGCAGCCGTGATGAAGAA<br>AG-3'               | 5'-<br>CTTTCTTCATCACGGCTGCGTTTCTCATGC<br>-3'             |
| <i>Bnip3</i> siRNA-<br>resistant | 5'-<br>TTGGAAGGCGTTTAACGACCAGTACGTC<br>CACCTTTTGAGGATCC-3' | 5'-<br>GGATCCTCAAAGGTGGACGTACTGGTC<br>GTAAACGCCTTCCAA-3' |
| <i>Jnk1</i> siRNA-<br>resistant  | 5'-<br>TCCTTGCGGAGATGGAGTATAAAGAAAA<br>CGTGGA-3'           | 5'-<br>TCCACGTTTTCTTTATACTCCATCTCGCCA<br>AGGA-3'         |

79 **Table S2. List of siRNA used in this study.**

| Gene name            | Species | Target Sequences          |
|----------------------|---------|---------------------------|
| <i>Bnip3</i>         | Rat     | 5'-CTGACAACCTCCACTAGTA-3' |
| <i>Erk1 (Mapk3)</i>  | Rat     | 5'-CGGCTGAAGGAGCTGATCT-3' |
| <i>Erk2 (Mapk1)</i>  | Rat     | 5'-GTGCTGTGTCTTCAAGAGC-3' |
| <i>Erk5 (Mapk7)</i>  | Rat     | 5'-CCCTCAGGGAACTGAAGAT-3' |
| <i>Jnk1 (Mapk8)</i>  | Rat     | 5-GCATGGGCTACAAGGAGAA-3'  |
| <i>JNK1 (MAPK8)</i>  | Human   | 5'-AGCTCCACCACCAAAGATC-3' |
| <i>Jnk2 (Mapk9)</i>  | Rat     | 5'-GGAATTGTTTGTGCTGCTT-3' |
| <i>JNK2 (MAPK9)</i>  | Human   | 5'-TTCCAAGGCACTGACCATA-3' |
| <i>Jnk3 (Mapk10)</i> | Rat     | 5'-GCCTCCGCCTCAGATATAT-3' |
| <i>Ppp1ca</i> #1     | Rat     | 5'-GCTTGTTGCTGGCCTATAA-3' |
| <i>Ppp1ca</i> #2     | Rat     | 5'-GAAATAGCCTCCATGTGCT-3' |
| <i>Ppp1cb</i> #1     | Rat     | 5'-CAAGTCTCGTGAAATCTTT-3' |
| <i>Ppp1cb</i> #2     | Rat     | 5'-CTTTATGATGTCACACCTT-3' |
| <i>Ppp1cc</i> #1     | Rat     | 5'-GTGACATCCACGGGCAGTA-3' |
| <i>Ppp1cc</i> #2     | Rat     | 5'-GTTGAAGATGGATATGAGT-3' |
| <i>Ppp2ca</i> #1     | Rat     | 5'-GAAAGTTTAACTTGTACA-3'  |
| <i>Ppp2ca</i> #2     | Rat     | 5'-GATACAAATTACTTGTTTA-3' |
| <i>Ppp2cb</i> #1     | Rat     | 5'-CTTTGATTATCTTCCACTT-3' |
| <i>Ppp2cb</i> #2     | Rat     | 5'-GCTTGTAATGGAAGGATAT-3' |

80

81 **Table S3. Sequence of real-time PCR primer used in this study.**

| <b>Gene name</b>     | <b>Species</b> | <b>Forward primer</b>              | <b>Reverse primer</b>              |
|----------------------|----------------|------------------------------------|------------------------------------|
| <i>Actb</i>          | Rat            | 5'-<br>GCAGGAGTACGATGAGTC<br>CG-3' | 5'-<br>ACGCAGCTCAGTAACAGTCC<br>-3' |
| <i>Bnip3</i>         | Rat            | 5'-<br>GTCGCAGAGCGGGGAGG<br>AGA-3' | 5'-<br>TCTGGGAGCGAGGTGGGCT<br>G-3' |
| <i>Erk1 (Mapk3)</i>  | Rat            | 5'-<br>TACCGAGCCCCAGAGATC<br>AT-3' | 5'-<br>TGGGATGGGGAACCCAGTAT-<br>3' |
| <i>Erk2 (Mapk1)</i>  | Rat            | 5'-<br>AATGTTCTGCACCGTGAC<br>CT-3' | 5'-<br>TGGTCTGGATCTGCAACACG<br>-3' |
| <i>Erk5 (Mapk7)</i>  | Rat            | 5'-<br>CGCCCCACCTTTTGACTT<br>TG-3' | 5'-<br>CCATGGCACAGTCTCCACTT-<br>3' |
| <i>Jnk1 (Mapk8)</i>  | Rat            | 5'-<br>ACTTAAAGCCAGTCAGGC<br>GA-3' | 5'-<br>TTGATGTACGGGTGCTGGAG<br>-3' |
| <i>Jnk2 (Mapk9)</i>  | Rat            | 5'-<br>TCCAGAAGTCATCCTGGG<br>CA-3' | 5'-<br>CTCTCCTGGGAACAGGACT<br>T-3' |
| <i>Jnk3 (Mapk10)</i> | Rat            | 5'-<br>GTTTGGTACGACCCTGCT<br>GA-3' | 5'-<br>GAGGGCTGGCCTTTGACTAC<br>-3' |

82
